# Supplementary material
Source: PubMed Central journal article supplement (PMC4084543)
Supplement: rstb20130258supp1.pdf [file rstb20130258supp1.pdf]

Appendix 1. Coefficient of variation (%) of flower traits for L and S flowers of *Narcissus papyraceus* populations.

| Population                                   | Morph | Flower diameter | Corona length | Corona diameter | Flower tube length | Flower tube width | Style length | Upper anther height | Lower anther height |
|----------------------------------------------|-------|-----------------|---------------|-----------------|--------------------|-------------------|--------------|---------------------|---------------------|
| Morocco: Tánger-Tetuán, Oued Lediane         | L     | 13.73           | 15.22         | 8.79            | 12.14              | 10.41             | 7.35         | 9.82                | 12.22               |
| Morocco: Tánger-Tetuán, Oued Lediane         | S     | 15.60           | 20.87         | 10.79           | 13.42              | 13.53             | 12.49        | 10.50               | 14.02               |
| Morocco: Tetuán-Larache, Souk el Arba Ayacha | L     | 10.13           | 13.33         | 7.26            | 9.56               | 9.84              | 6.89         | 7.96                | 9.00                |
| Morocco: Tánger-Tetuán, Ragaia               | L     | 12.15           | 17.10         | 8.96            | 10.32              | 10.20             | 12.33        | 9.51                | 8.87                |
| Morocco: Tánger-Tetuán, Ragaia               | S     | 12.83           | 14.09         | 7.84            | 9.47               | 10.84             | 11.21        | 8.93                | 10.31               |
| Spain: Málaga, Casares-Manilva               | L     | 12.84           | 12.67         | 8.62            | 11.68              | 10.85             | 10.09        | 10.22               | 12.82               |
| Spain: Málaga, Casares-Manilva               | S     | 14.94           | 12.49         | 8.30            | 10.69              | 10.15             | 6.95         | 9.46                | 12.27               |
| Spain: Málaga, San Pedro de Alcántara        | L     | 15.12           | 14.97         | 8.59            | 9.76               | 13.27             | 9.67         | 9.26                | 10.13               |
| Spain: Cádiz, Tarifa-Bolonia                 | L     | 18.74           | 15.39         | 11.20           | 11.87              | 18.62             | 13.23        | 11.23               | 12.93               |
| Spain: Cádiz, Tarifa-Bolonia                 | S     | 14.58           | 15.62         | 10.73           | 10.48              | 14.69             | 10.50        | 11.50               | 11.10               |
| Spain: Cádiz, Los Barrios                    | L     | 12.99           | 14.70         | 9.01            | 9.87               | 16.07             | 11.32        | 9.60                | 12.84               |
| Spain: Cádiz, Los Barrios                    | S     | 13.25           | 12.65         | 7.31            | 9.40               | 10.26             | 13.66        | 9.76                | 12.00               |
| Spain: Cádiz, El Bosque                      | L     | 15.35           | 14.90         | 8.63            | 9.75               | 10.49             | 9.68         | 10.87               | 13.12               |
| Spain: Cádiz, El Bosque                      | S     | 17.99           | 19.99         | 12.49           | 11.45              | 14.91             | 14.83        | 15.53               | 15.27               |
| Spain: Huelva, Villanueva de los Castillejos | L     | 11.79           | 12.59         | 7.09            | 8.75               | 10.01             | 8.27         | 9.20                | 11.22               |
| Spain: Huelva, Hinojos, El Caoso             | L     | 13.06           | 12.60         | 8.35            | 9.85               | 18.10             | 9.30         | 8.36                | 11.65               |
| Spain: Huelva, Hinojos, Coto del Rey         | L     | 11.12           | 16.61         | 8.90            | 9.95               | 9.30              | 9.51         | 8.81                | 10.17               |
| Spain: Huelva, Almonte, El Rocío             | L     | 11.12           | 15.44         | 8.62            | 11.41              | 10.60             | 8.75         | 8.49                | 10.49               |
| Spain: Sevilla, Aznalcázar                   | L     | 10.87           | 15.92         | 10.00           | 9.84               | 10.89             | 10.10        | 8.40                | 10.69               |
| Spain: Córdoba, Carcabuey, Valdecañas        | L     | 9.71            | 15.23         | 8.29            | 12.37              | 11.35             | 9.92         | 9.92                | 11.46               |
| Portugal: Algarve, Barranco São Miguel       | L     | 11.38           | 13.40         | 7.19            | 10.28              | 11.62             | 8.82         | 9.06                | 11.22               |
| Portugal: Algarve, Mesines-Alte              | L     | 10.84           | 13.27         | 6.48            | 10.20              | 10.87             | 10.15        | 9.34                | 11.16               |
| Portugal: Algarve, Tavira                    | L     | 15.32           | 16.67         | 8.66            | 10.36              | 12.38             | 8.44         | 9.71                | 10.70               |

Appendix 2. Pearson’s coefficients of correlations among floral traits for L and S flowers from dimorphic populations. See table 1 for population details on sample size. Floral traits are coded as follows: 1) flower diameter, 2) corona diameter, 3) corona length, 4) flower tube length, 5) flower tube width, 6) style length, 7) upper anther height, and 8) lower anther height

| Population      | Pearson’s coefficient of correlation among floral traits for L flowers |        |        |       |       |       |       | Pearson’s coefficient of correlation among floral traits for S flowers |       |        |       |        |       |       |
|-----------------|------------------------------------------------------------------------|--------|--------|-------|-------|-------|-------|------------------------------------------------------------------------|-------|--------|-------|--------|-------|-------|
| Oued            |                                                                        |        |        |       |       |       |       |                                                                        |       |        |       |        |       |       |
| Lediane         | 1                                                                      | 2      | 3      | 4     | 5     | 6     | 7     | 1                                                                      | 2     | 3      | 4     | 5      | 6     | 7     |
| 2               | 0.461                                                                  |        |        |       |       |       |       | 0.378                                                                  |       |        |       |        |       |       |
| 3               | 0.574                                                                  | 0.462  |        |       |       |       |       | 0.399                                                                  | 0.113 |        |       |        |       |       |
| 4               | 0.357                                                                  | 0.147  | 0.369  |       |       |       |       | 0.454                                                                  | 0.607 | 0.428  |       |        |       |       |
| 5               | 0.550                                                                  | 0.251  | 0.376  | 0.305 |       |       |       | 0.201                                                                  | 0.125 | 0.117  | 0.151 |        |       |       |
| 6               | 0.415                                                                  | 0.122  | 0.311  | 0.258 | 0.176 |       |       | 0.407                                                                  | 0.560 | 0.260  | 0.610 | 0.114  |       |       |
| 7               | 0.394                                                                  | 0.206  | 0.303  | 0.759 | 0.323 | 0.352 |       | 0.536                                                                  | 0.537 | 0.249  | 0.796 | 0.159  | 0.638 |       |
| 8               | 0.536                                                                  | 0.397  | 0.361  | 0.626 | 0.438 | 0.379 | 0.791 | 0.422                                                                  | 0.458 | 0.196  | 0.755 | 0.195  | 0.692 | 0.872 |
| Ragaia          |                                                                        |        |        |       |       |       |       |                                                                        |       |        |       |        |       |       |
| 2               | 0.327                                                                  |        |        |       |       |       |       | 0.302                                                                  |       |        |       |        |       |       |
| 3               | 0.425                                                                  | 0.257  |        |       |       |       |       | 0.413                                                                  | 0.092 |        |       |        |       |       |
| 4               | 0.294                                                                  | 0.017  | -0.145 |       |       |       |       | 0.115                                                                  | 0.085 | -0.008 |       |        |       |       |
| 5               | 0.259                                                                  | 0.145  | 0.298  | 0.157 |       |       |       | 0.357                                                                  | 0.186 | 0.355  | 0.145 |        |       |       |
| 6               | 0.399                                                                  | 0.039  | -0.122 | 0.624 | 0.081 |       |       | 0.175                                                                  | 0.223 | -0.146 | 0.388 | 0.038  |       |       |
| 7               | 0.269                                                                  | -0.002 | -0.179 | 0.853 | 0.044 | 0.561 |       | 0.174                                                                  | 0.215 | -0.012 | 0.763 | 0.007  | 0.409 |       |
| 8               | 0.442                                                                  | 0.155  | -0.047 | 0.738 | 0.109 | 0.612 | 0.776 | 0.164                                                                  | 0.115 | -0.066 | 0.575 | -0.066 | 0.356 | 0.823 |
| Casares-Manilva |                                                                        |        |        |       |       |       |       |                                                                        |       |        |       |        |       |       |
| 2               | 0.412                                                                  |        |        |       |       |       |       | 0.634                                                                  |       |        |       |        |       |       |
| 3               | 0.518                                                                  | 0.372  |        |       |       |       |       | 0.777                                                                  | 0.508 |        |       |        |       |       |
| 4               | 0.080                                                                  | 0.210  | 0.292  |       |       |       |       | 0.484                                                                  | 0.064 | 0.422  |       |        |       |       |

|                |       |       |       |       |       |       |       |       |       |       |       |       |       |       |
|----------------|-------|-------|-------|-------|-------|-------|-------|-------|-------|-------|-------|-------|-------|-------|
| 5              | 0.572 | 0.234 | 0.635 | 0.130 |       |       |       | 0.819 | 0.367 | 0.776 | 0.392 |       |       |       |
| 6              | 0.111 | 0.209 | 0.136 | 0.588 | 0.183 |       |       | 0.531 | 0.193 | 0.230 | 0.745 | 0.258 |       |       |
| 7              | 0.115 | 0.223 | 0.198 | 0.854 | 0.155 | 0.650 |       | 0.438 | 0.091 | 0.419 | 0.958 | 0.277 | 0.682 |       |
| 8              | 0.051 | 0.176 | 0.180 | 0.703 | 0.137 | 0.711 | 0.821 | 0.554 | 0.171 | 0.432 | 0.873 | 0.447 | 0.642 | 0.864 |
| Tarifa-Bolonia |       |       |       |       |       |       |       |       |       |       |       |       |       |       |
| 2              | 0.591 |       |       |       |       |       |       | 0.393 |       |       |       |       |       |       |
| 3              | 0.803 | 0.440 |       |       |       |       |       | 0.599 | 0.406 |       |       |       |       |       |
| 4              | 0.530 | 0.435 | 0.451 |       |       |       |       | 0.209 | 0.536 | 0.323 |       |       |       |       |
| 5              | 0.625 | 0.441 | 0.654 | 0.527 |       |       |       | 0.428 | 0.404 | 0.690 | 0.393 |       |       |       |
| 6              | 0.511 | 0.350 | 0.355 | 0.738 | 0.402 |       |       | 0.142 | 0.520 | 0.102 | 0.424 | 0.213 |       |       |
| 7              | 0.550 | 0.499 | 0.482 | 0.873 | 0.414 | 0.713 |       | 0.357 | 0.642 | 0.390 | 0.847 | 0.465 | 0.564 |       |
| 8              | 0.481 | 0.424 | 0.433 | 0.741 | 0.332 | 0.682 | 0.879 | 0.371 | 0.518 | 0.305 | 0.732 | 0.407 | 0.571 | 0.802 |
| Los Barrios    |       |       |       |       |       |       |       |       |       |       |       |       |       |       |
| 2              | 0.363 |       |       |       |       |       |       | 0.458 |       |       |       |       |       |       |
| 3              | 0.657 | 0.223 |       |       |       |       |       | 0.545 | 0.559 |       |       |       |       |       |
| 4              | 0.473 | 0.122 | 0.402 |       |       |       |       | 0.591 | 0.432 | 0.614 |       |       |       |       |
| 5              | 0.574 | 0.322 | 0.653 | 0.532 |       |       |       | 0.562 | 0.292 | 0.211 | 0.243 |       |       |       |
| 6              | 0.479 | 0.190 | 0.183 | 0.606 | 0.305 |       |       | 0.422 | 0.334 | 0.247 | 0.478 | 0.273 |       |       |
| 7              | 0.532 | 0.200 | 0.334 | 0.859 | 0.506 | 0.671 |       | 0.614 | 0.428 | 0.533 | 0.819 | 0.271 | 0.600 |       |
| 8              | 0.354 | 0.147 | 0.138 | 0.652 | 0.393 | 0.555 | 0.843 | 0.540 | 0.351 | 0.504 | 0.777 | 0.284 | 0.536 | 0.843 |
| El Bosque      |       |       |       |       |       |       |       |       |       |       |       |       |       |       |
| 2              | 0.673 |       |       |       |       |       |       | 0.647 |       |       |       |       |       |       |
| 3              | 0.423 | 0.291 |       |       |       |       |       | 0.770 | 0.859 |       |       |       |       |       |
| 4              | 0.557 | 0.478 | 0.105 |       |       |       |       | 0.656 | 0.433 | 0.410 |       |       |       |       |
| 5              | 0.272 | 0.324 | 0.377 | 0.200 |       |       |       | 0.641 | 0.354 | 0.431 | 0.502 |       |       |       |
| 6              | 0.537 | 0.425 | 0.154 | 0.814 | 0.067 |       |       | 0.771 | 0.659 | 0.651 | 0.778 | 0.415 |       |       |
| 7              | 0.714 | 0.527 | 0.268 | 0.926 | 0.170 | 0.764 |       | 0.630 | 0.466 | 0.367 | 0.923 | 0.480 | 0.809 |       |

|            |       |       |       |       |       |       |       |       |       |       |       |       |       |       |
|------------|-------|-------|-------|-------|-------|-------|-------|-------|-------|-------|-------|-------|-------|-------|
| 8          | 0.507 | 0.488 | 0.285 | 0.815 | 0.149 | 0.801 | 0.780 | 0.625 | 0.480 | 0.410 | 0.805 | 0.395 | 0.788 | 0.913 |
| *Barranco  |       |       |       |       |       |       |       |       |       |       |       |       |       |       |
| São Miguel |       |       |       |       |       |       |       |       |       |       |       |       |       |       |
| 2          | 0.393 |       |       |       |       |       |       |       |       |       |       |       |       |       |
| 3          | 0.599 | 0.406 |       |       |       |       |       |       |       |       |       |       |       |       |
| 4          | 0.209 | 0.536 | 0.323 |       |       |       |       |       |       |       |       |       |       |       |
| 5          | 0.428 | 0.404 | 0.690 | 0.393 |       |       |       |       |       |       |       |       |       |       |
| 6          | 0.142 | 0.520 | 0.102 | 0.424 | 0.213 |       |       |       |       |       |       |       |       |       |
| 7          | 0.357 | 0.642 | 0.390 | 0.847 | 0.465 | 0.564 |       |       |       |       |       |       |       |       |
| 8          | 0.371 | 0.518 | 0.305 | 0.732 | 0.407 | 0.571 | 0.802 |       |       |       |       |       |       |       |

Phenotypic correlations among floral traits for the S morph were not included because sample size was small.

Appendix 3. Pearson's coefficients of correlations among floral traits for L flowers from L-monomorphic or strongly L-biased populations. See table 1 for population details on simple size . Floral traits are coded as follows: 1) flower diameter, 2) corona diameter, 3) corona length, 4) flower tube length, 5) flower tube width, 6) style length, 7) upper anther height, and 8) lower anther height

| Population          | Pearson's coefficient of correlation among floral traits for L flowers |        |       |       |        |       |       | Population           | Pearson's coefficient of correlation among floral traits for L flowers |       |       |        |        |       |       |
|---------------------|------------------------------------------------------------------------|--------|-------|-------|--------|-------|-------|----------------------|------------------------------------------------------------------------|-------|-------|--------|--------|-------|-------|
|                     | 1                                                                      | 2      | 3     | 4     | 5      | 6     | 7     |                      | 1                                                                      | 2     | 3     | 4      | 5      | 6     | 7     |
| Tetuán-Larache      |                                                                        |        |       |       |        |       |       | El Rocío             |                                                                        |       |       |        |        |       |       |
| 2                   | 0.078                                                                  |        |       |       |        |       |       |                      | 0.341                                                                  |       |       |        |        |       |       |
| 3                   | 0.430                                                                  | -0.039 |       |       |        |       |       |                      | 0.349                                                                  | 0.254 |       |        |        |       |       |
| 4                   | 0.126                                                                  | 0.170  | 0.069 |       |        |       |       |                      | 0.218                                                                  | 0.193 | 0.059 |        |        |       |       |
| 5                   | 0.322                                                                  | 0.116  | 0.367 | 0.001 |        |       |       |                      | 0.407                                                                  | 0.233 | 0.115 | 0.120  |        |       |       |
| 6                   | 0.172                                                                  | 0.059  | 0.205 | 0.352 | 0.129  |       |       |                      | 0.496                                                                  | 0.323 | 0.239 | 0.391  | 0.117  |       |       |
| 7                   | 0.216                                                                  | 0.218  | 0.162 | 0.826 | -0.004 | 0.329 |       |                      | 0.339                                                                  | 0.262 | 0.171 | 0.740  | 0.084  | 0.534 |       |
| 8                   | 0.157                                                                  | 0.223  | 0.061 | 0.680 | -0.090 | 0.292 | 0.737 |                      | 0.259                                                                  | 0.274 | 0.165 | 0.602  | 0.120  | 0.551 | 0.681 |
| S. Pedro Alcántara  |                                                                        |        |       |       |        |       |       | Azncázar             |                                                                        |       |       |        |        |       |       |
| 2                   | 0.514                                                                  |        |       |       |        |       |       |                      | 0.418                                                                  |       |       |        |        |       |       |
| 3                   | 0.607                                                                  | 0.409  |       |       |        |       |       |                      | 0.471                                                                  | 0.118 |       |        |        |       |       |
| 4                   | 0.134                                                                  | 0.161  | 0.087 |       |        |       |       |                      | 0.011                                                                  | 0.096 | 0.056 |        |        |       |       |
| 5                   | 0.358                                                                  | 0.351  | 0.469 | 0.366 |        |       |       |                      | 0.414                                                                  | 0.382 | 0.418 | -0.006 |        |       |       |
| 6                   | 0.441                                                                  | 0.281  | 0.268 | 0.621 | 0.401  |       |       |                      | 0.284                                                                  | 0.298 | 0.234 | 0.502  | 0.122  |       |       |
| 7                   | 0.292                                                                  | 0.394  | 0.170 | 0.846 | 0.439  | 0.657 |       |                      | 0.106                                                                  | 0.185 | 0.138 | 0.769  | 0.059  | 0.605 |       |
| 8                   | 0.157                                                                  | 0.277  | 0.135 | 0.758 | 0.334  | 0.628 | 0.840 |                      | 0.061                                                                  | 0.136 | 0.028 | 0.656  | -0.082 | 0.706 | 0.766 |
| Villanueva de los C |                                                                        |        |       |       |        |       |       | Carcabuey-Valdecañas |                                                                        |       |       |        |        |       |       |
| 2                   | 0.504                                                                  |        |       |       |        |       |       |                      | 0.455                                                                  |       |       |        |        |       |       |
| 3                   | 0.492                                                                  | 0.403  |       |       |        |       |       |                      | 0.053                                                                  | 0.262 |       |        |        |       |       |

|   |       |       |       |       |       |       |       |       |       |       |       |        |       |       |
|---|-------|-------|-------|-------|-------|-------|-------|-------|-------|-------|-------|--------|-------|-------|
| 4 | 0.483 | 0.241 | 0.279 |       |       |       |       | 0.301 | 0.339 | 0.141 |       |        |       |       |
| 5 | 0.598 | 0.383 | 0.605 | 0.365 |       |       |       | 0.298 | 0.114 | 0.143 | 0.120 |        |       |       |
| 6 | 0.448 | 0.218 | 0.196 | 0.504 | 0.315 |       |       | 0.387 | 0.440 | 0.025 | 0.551 | -0.009 |       |       |
| 7 | 0.522 | 0.304 | 0.301 | 0.744 | 0.367 | 0.675 |       | 0.267 | 0.269 | 0.183 | 0.601 | 0.071  | 0.545 |       |
| 8 | 0.448 | 0.230 | 0.184 | 0.573 | 0.359 | 0.666 | 0.773 | 0.286 | 0.267 | 0.063 | 0.460 | 0.093  | 0.619 | 0.689 |

Hinojos,  
El Caoso

Mesines-.Alte

|   |        |        |        |       |       |       |       |       |       |       |       |        |       |       |
|---|--------|--------|--------|-------|-------|-------|-------|-------|-------|-------|-------|--------|-------|-------|
| 2 | 0.276  |        |        |       |       |       |       | 0.397 |       |       |       |        |       |       |
| 3 | 0.559  | -0.138 |        |       |       |       |       | 0.481 | 0.259 |       |       |        |       |       |
| 4 | 0.374  | 0.239  | 0.379  |       |       |       |       | 0.295 | 0.115 | 0.188 |       |        |       |       |
| 5 | -0.038 | 0.014  | 0.009  | 0.632 |       |       |       | 0.541 | 0.326 | 0.370 | 0.045 |        |       |       |
| 6 | 0.140  | -0.004 | -0.053 | 0.485 | 0.328 |       |       | 0.509 | 0.242 | 0.251 | 0.566 | 0.168  |       |       |
| 7 | 0.359  | 0.227  | 0.089  | 0.777 | 0.671 | 0.546 |       | 0.379 | 0.158 | 0.243 | 0.771 | -0.002 | 0.667 |       |
| 8 | 0.508  | 0.140  | 0.325  | 0.679 | 0.370 | 0.439 | 0.765 | 0.312 | 0.108 | 0.303 | 0.623 | -0.068 | 0.623 | 0.757 |

Hinojos, Coto  
del Rey

Tavira

|   |       |        |        |        |        |       |       |       |        |       |       |       |       |       |
|---|-------|--------|--------|--------|--------|-------|-------|-------|--------|-------|-------|-------|-------|-------|
| 2 | 0.394 |        |        |        |        |       |       | 0.144 |        |       |       |       |       |       |
| 3 | 0.269 | -0.147 |        |        |        |       |       | 0.675 | 0.048  |       |       |       |       |       |
| 4 | 0.112 | 0.217  | -0.102 |        |        |       |       | 0.303 | -0.208 | 0.384 |       |       |       |       |
| 5 | 0.234 | 0.090  | 0.360  | -0.115 |        |       |       | 0.516 | 0.117  | 0.542 | 0.234 |       |       |       |
| 6 | 0.339 | 0.310  | -0.002 | 0.539  | -0.144 |       |       | 0.370 | -0.133 | 0.352 | 0.588 | 0.241 |       |       |
| 7 | 0.247 | 0.290  | -0.106 | 0.866  | -0.077 | 0.617 |       | 0.352 | -0.183 | 0.430 | 0.857 | 0.352 | 0.646 |       |
| 8 | 0.180 | 0.249  | -0.059 | 0.689  | -0.120 | 0.521 | 0.773 | 0.320 | -0.107 | 0.344 | 0.675 | 0.233 | 0.648 | 0.782 |
